# Supplementary material
Source: Springer Nature journal article supplement (https://www.springermedizin.de/resource/supplementary/12984_2012_517_MOESM4_ESM.pdf/9604766)

**A**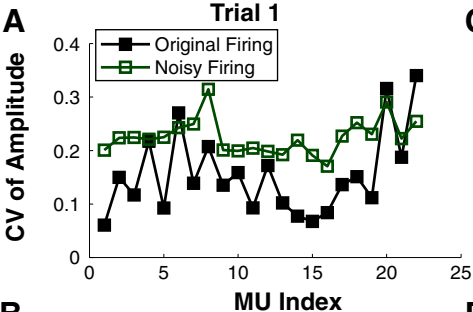**C**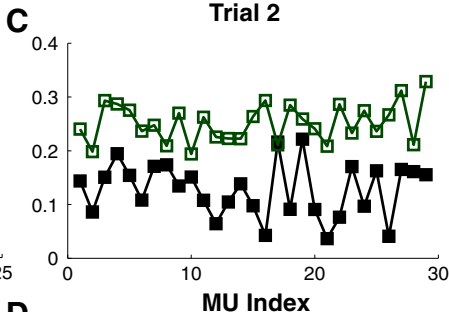**B**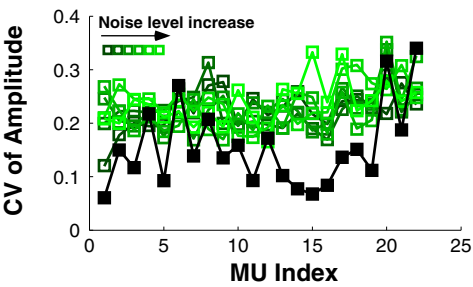**D**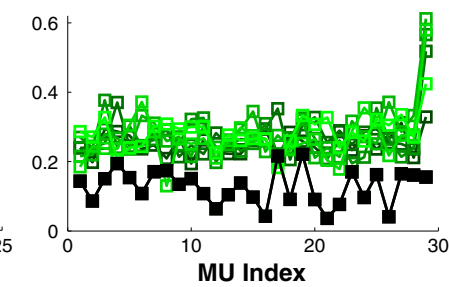

Supplement: MOESM4 [file 9604766]
